# Supplementary material for: Dietary Taurine Intake Affects the Growth Performance, Lipid Composition, and Antioxidant Defense of Juvenile Ivory Shell (Babylonia areolata)
Source: MDPI journal article supplement (doi:10.3390/ani13162592), 2023-08-11
Supplement: s1 [file s1]

**Table S1:** Ingredients and composition of experimental diets.

| Ingredients (%)                           |    | Diets            |
|-------------------------------------------|----|------------------|
| Forage fish meat<br>(Decapterus maruadsi) |    | 58.00            |
| Soy protein concentrate                   |    | 12.00            |
| $\alpha$ -starch                          |    | 10.00            |
| Krill meal                                |    | 4.00             |
| Squid splanchnic powder                   |    | 3.50             |
| Monocalcium phosphate                     |    | 2.00             |
| Spirulina                                 |    | 2.00             |
| Vitamin premix                            |    | 2.00             |
| Fish oil                                  |    | 4.00             |
| Gelatine                                  |    | 2.50             |
| Total                                     |    | 100              |
| Moisture (%)                              |    | 52.47 $\pm$ 0.04 |
| Crude protein (%)                         | WW | 24.84 $\pm$ 0.21 |
|                                           | DW | 52.26 $\pm$ 0.40 |
| Crude lipid (%)                           | WW | 3.52 $\pm$ 0.04  |
|                                           | DW | 7.41 $\pm$ 0.08  |
| Ash (%)                                   | WW | 15.95 $\pm$ 0.33 |
|                                           | DW | 33.56 $\pm$ 0.67 |
| Taurine (mg/g)                            | WW | 0.61 $\pm$ 0.06  |
|                                           | DW | 1.28 $\pm$ 0.12  |

WW, % wet weight; DW, % dry weight.

**Table S2:** Fatty acid profiles (%) of soft artificial feed without taurine supplement

| Fatty acids | % of total fatty acids |
|-------------|------------------------|
| C14:0       | 2.05 $\pm$ 0.07        |
| C15:0       | 0.36 $\pm$ 0.03        |
| C16:0       | 29.68 $\pm$ 0.63       |
| C17:0       | 0.39 $\pm$ 0.02        |
| C18:0       | 3.59 $\pm$ 0.04        |
| SFA         | 36.06 $\pm$ 0.72       |
| C16:1n7     | 2.76 $\pm$ 0.10        |
| C17:1n7     | 0.13 $\pm$ 0.00        |
| C18:1n9 (z) | 9.72 $\pm$ 0.41        |
| C18:1n9 (e) | 2.73 $\pm$ 0.12        |
| C20:1n9     | 1.00 $\pm$ 0.06        |
| MUFA        | 16.34 $\pm$ 0.62       |
| C16:3n3     | 0.40 $\pm$ 0.01        |
| C18:2n6     | 16.50 $\pm$ 0.09       |
| C18:3n6     | 3.29 $\pm$ 0.03        |
| C18:3n3     | 1.38 $\pm$ 0.05        |
| C20:2n6     | 0.20 $\pm$ 0.00        |
| C20:4n6     | 1.82 $\pm$ 0.03        |
| C20:5n3     | 4.12 $\pm$ 0.06        |
| C22:5n-3    | 2.93 $\pm$ 0.04        |
| C22:6n-3    | 16.95 $\pm$ 0.22       |
| PUFA        | 47.59 $\pm$ 0.49       |

**Table S3:** Sequences of primers used for real-time quantitative PCR.

| Gene   | Sequence (5'- 3')         | Product size (bp) |
|--------|---------------------------|-------------------|
| Leptin | F: GAAACGACGATGCCTGTGG    | 129               |
|        | R: TGTCCTGTTCTTCTACGTGCTG |                   |
| Orexin | F: CAGATGCGATAATAGCGGTCA  | 138               |
|        | R: AATTGCCGATCTGCGCTT     |                   |

|                 |                           |     |
|-----------------|---------------------------|-----|
| NPY             | F: TGCCGAAGACCCAGGAGTT    | 150 |
|                 | R: TGGTGGTGATCGTGGTGCT    |     |
| Cholecystokinin | F: ATGACCTTGACCTCCGTGG    | 123 |
|                 | R: AACCTCCACCACCGCTTTC    |     |
| $\beta$ -actin  | F: TCTTGGGTATGGAATCTGCTGG | 130 |
|                 | R: CCTTTGCATTCTGTCAGCGAT  |     |

---

*NPY: Neuropeptide Y.*
